# An empirically-driven guide on using Bayes Factors for M/EEG decoding

Lina Teichmann<sup>1\*</sup>, Denise Moerel<sup>2</sup>, Chris Baker<sup>1</sup>, Tijl Grootswagers<sup>3</sup>

<sup>1</sup> Laboratory of Brain and Cognition, National Institute of Mental Health, Bethesda, MD, USA

<sup>2</sup> Department of Cognitive Science, Macquarie University, Sydney, Australia

<sup>3</sup> The MARCS Institute for Brain, Behaviour & Development, Western Sydney University, Sydney, Australia

\*Corresponding author: [lina.teichmann@nih.gov](mailto:lina.teichmann@nih.gov)

**Acknowledgements:** This research was supported (in part) by the Intramural Research Program of the NIMH (ZIAMH002909). We thank Lincoln Colling for contributing to the repository.

## Abstract

Bayes Factors can be used to provide quantifiable evidence for contrasting hypotheses and have thus become increasingly popular in cognitive science. However, Bayes Factors are rarely used to statistically assess the results of neuroimaging experiments. Here, we provide an empirically-driven guide on implementing Bayes Factors for time-series neural decoding results. Using real and simulated Magnetoencephalography (MEG) data, we examine how parameters such as the shape of the prior and data size affect Bayes Factors. Additionally, we discuss benefits Bayes Factors bring to analysing multivariate pattern analysis data and show how using Bayes Factors can be used instead or in addition to traditional frequentist approaches.

## 35 1. Introduction

36 The goal of multivariate decoding in cognitive neuroscience is to infer whether information is  
37 represented in the brain (Hebart & Baker, 2018). To draw meaningful conclusions in this  
38 information-based framework, we need to statistically assess whether the conditions of  
39 interest evoke different data patterns. In the context of time-resolved neuroimaging data,  
40 activation patterns are extracted across MEG or EEG sensors and classification accuracies  
41 are used to estimate information at every timepoint (see Figure 1 for an example). Currently,  
42 null hypothesis statistical testing (NHST) and p-values are the de-facto method of choice for  
43 statistically assessing classification accuracies, but recent studies have started using Bayes  
44 Factors (Grootswagers et al., 2021; e.g., Grootswagers, Robinson, & Carlson, 2019b;  
45 Grootswagers, Robinson, Shatek, et al., 2019; Kaiser et al., 2018; Karimi-Rouzbahani et al.,  
46 2021; Mai et al., 2019; Proklova et al., 2019; Robinson et al., 2019, 2021). Under the null  
47 hypothesis, the mean equals chance decoding and under the alternative hypothesis the mean  
48 is larger than chance decoding. The direct comparison of the predictions of two hypotheses is  
49 one of the strengths of the Bayesian framework of hypothesis testing (Jeffreys, 1939, 1935).  
50 Bayes Factors describe the probability of one hypothesis over the other given the observed  
51 data. In the multivariate pattern analysis (MVPA) context, this means we use Bayes Factors  
52 to test the probability of above-chance classification versus at-chance classification given the  
53 decoding results across participants at each timepoint. The goal of the current paper is to  
54 present and discuss Bayes Factors from a practical standpoint in the context of time-series  
55 decoding, while referring the reader to published work focusing on the theoretical and technical  
56 background of Bayes Factors.

57  
58 The Bayesian approach brings several advantages over the traditional NHST framework  
59 (Dienes, 2011, 2014, 2016b; Keyesers et al., 2020; Morey et al., 2016; Wagenmakers et al.,  
60 2018). In addition to allowing us to contrast evidence for above-chance versus at-chance  
61 decoding directly, Bayes Factors are a measure of strength of evidence for one hypothesis  
62 versus another. That means, we can *directly* assess how much evidence we have for different  
63 analyses. For example, if we were interested in testing whether viewing different colours  
64 evokes different neural responses, we could examine differences in the neural signal evoked  
65 by seeing red, green, and yellow objects. Using Bayes Factors, we could then directly compare  
66 whether red versus green can be decoded as well as red versus yellow. Larger Bayes Factors  
67 reflect more evidence which makes the interpretation of statistical results across analyses  
68 more intuitive. Another advantage is that Bayes Factors can be calculated iteratively while  
69 more data are being collected and that testing can be stopped when there is a sufficient

70 amount of evidence (Keyesers et al., 2020; Wagenmakers et al., 2018). Such stopping-rules  
71 could be accompanied by a pre-specified acquisition plan and potentially an (informal)  
72 preregistration via portals such as the Open Science Framework (Foster & Deardorff, 2017).  
73 Using the data to determine when enough evidence has been collected is particularly relevant  
74 for neuroimaging experiments, as it might significantly reduce research costs and reduce the  
75 risk of having underpowered studies. Thus, using a Bayesian approach to statistically assess  
76 time-series classification results can be beneficial both from a theoretical as well as an  
77 economic standpoint and might ease the ability to interpret and communicate scientific  
78 findings.

79

80 While Bayes Factors provide an alternative to the more traditional NHST framework,  
81 incorporating Bayes Factors into existing time-series decoding pipelines may seem daunting.  
82 Introductory papers often focus on mathematical aspects, and on relatively straightforward  
83 behavioural experiments (e.g., Ly et al., 2016; Morey et al., 2016; Rouder et al., 2009). We  
84 present an example based on a previously published time-series decoding study (Teichmann  
85 et al., 2019) and will present results from simulations to show the influence of certain  
86 parameters on Bayes Factors. We make use of the established Bayes Factor R package  
87 (Morey et al., 2015) to calculate the Bayes Factors but provide sample codes along with this  
88 paper showing how to access the Bayes Factor R package via Matlab and Python  
89 ([https://github.com/LinaTeichmann1/BFF\\_repo](https://github.com/LinaTeichmann1/BFF_repo)). We also show how the Bayes Factors in our  
90 example compare to p-values. Based on empirical evidence, we will give recommendations  
91 for Bayesian analysis applied to M/EEG classification results. The aim of this paper is to  
92 provide a broad introduction to Bayes Factors from a viewpoint of time-series neuroimaging  
93 decoding. We aim to do so without going into the technical or mathematical detail, and instead  
94 provide pointers to relevant literature on the specifics.

95

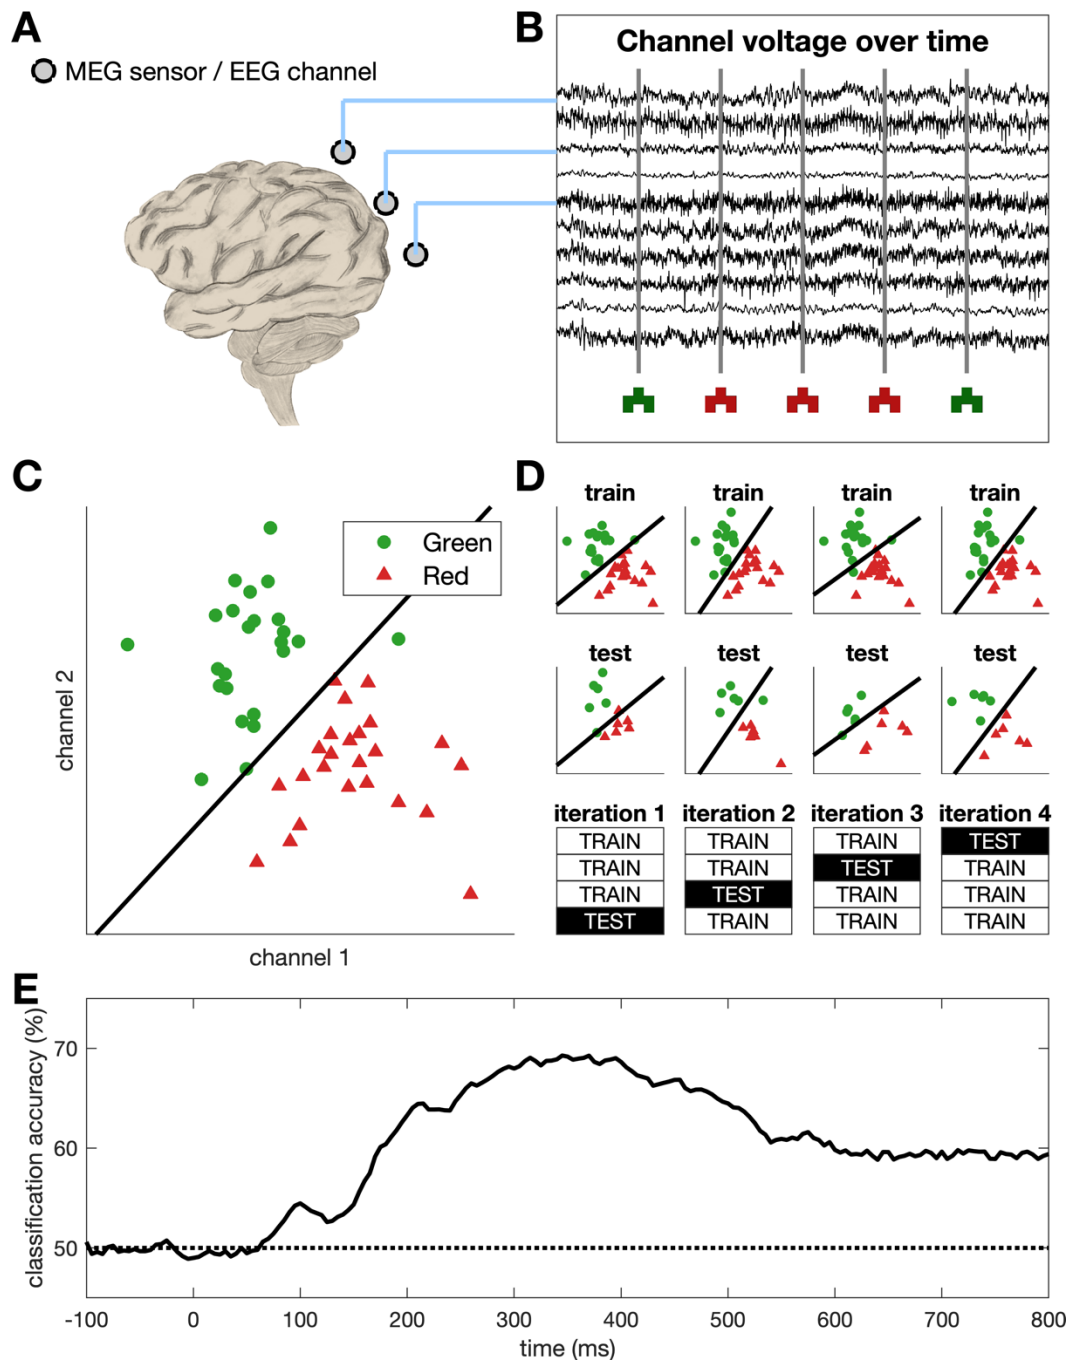

96

97 **Figure 1. Overview of MVPA for time-series neural data.** (A) Example MEG sensors / EEG  
 98 channels. (B) Simulated time-series neuroimaging data for a few sensors/channels. Vertical  
 99 lines show stimulus onsets with example stimuli plotted below. Data is first epoched from -100  
 100 to 800 ms relative to stimulus onset, resulting in multiple time-series chunks associated with  
 101 seeing a red or a green shape. (C) Using the epoched data, we can extract the sensor/channel  
 102 activation pattern across the different sensors/channels (only 2 displayed for simplicity) for  
 103 every trial at every timepoint. Then a classifier (black line) is trained to differentiate between  
 104 the activation patterns evoked by red and green trials. The shape of the stimuli is not relevant  
 105 in this context. (D) Example of a 4-fold cross validation where the classifier is trained on three  
 106 quarters of the data and tested on the left-out quarter. This process is repeated at every  
 107 timepoint. (E) We can calculate how often the classifier accurately predicts the colour of the  
 108 stimulus at each timepoint by averaging across all testing folds. Theoretical chance level is  
 109 50% as there are two conditions in the simulated data (red and green). During the period

110 before stimulus onset, we expect decoding to be at chance, and thus the baseline period can  
111 serve as a sanity check.

112

## 113 2. Methods & Results

### 114 2.1 Example dataset & inferences based of Bayes Factors

115 The aim of the current paper is to show how to use Bayes Factors when assessing time-series  
116 neuroimaging classification results and test what effect different analysis parameters have on  
117 the results. We have used a practical example of previously published MEG data (Teichmann  
118 et al., 2019), which we re-analysed using Bayes Factors. In the original experiment, eighteen  
119 participants viewed coloured shapes and grayscale objects in separate blocks while the neural  
120 signal was recorded using MEG. Here, we only considered the coloured shape trials ("real  
121 colour blocks", 1600 trials in total). Identical shapes were coloured in red or green and were  
122 shown for 100 ms followed by an inter-stimulus-interval of 800-1100 ms. The data was  
123 epoched from -100 ms to 800 ms (200 Hz resolution) relative to stimulus onset and a linear  
124 classifier was used to differentiate between the neural responses evoked by red and green  
125 shapes. A 5-fold cross-validation was used with the classifier being trained on 80% of the data  
126 and tested on the remaining 20%. This classification analysis resulted in decoding accuracies  
127 over time for each participant. In the original study, permutation tests and cluster-corrected p-  
128 values were used to assess decoding accuracies as implemented in CoSMoMVPA (Oosterhof  
129 et al., 2016). Here, we calculated Bayes Factors instead and examined how parameter  
130 changes affected the results.

131

132 When running statistical tests on classification results, we are interested in whether decoding  
133 accuracy is above-chance at each timepoint. To test this using a frequentist approach, we can  
134 use permutation tests to establish whether there is enough evidence to reject  $H_0$  which states  
135 that decoding is equal to chance. If there is enough evidence, we can reject  $H_0$  and conclude  
136 that decoding is different from chance. Given that below-chance decoding accuracies are not  
137 meaningful, we usually are interested only in above-chance decoding (directional hypothesis).  
138 In contrast to the frequentist approach, Bayes Factors quantify how much the plausibility of  
139 two hypotheses changes, given the data (see e.g., Ly et al., 2016). Here, we ran a Bayesian  
140 t-test of Bayes Factor R package (Morey et al., 2015) at each timepoint, testing whether the  
141 data is more consistent with  $H_a$  (decoding is larger than chance) over  $H_0$  (decoding is equal to  
142 chance). The resulting Bayes Factors center around 1 with numbers smaller than 1  
143 representing evidence for  $H_0$  and numbers larger than 1 representing evidence for  $H_a$ . In  
144 contrast to p-values, Bayes Factors are directly interpretable and comparable (cf. Keyser et

145 al., 2020; Morey et al., 2016; Wagenmakers et al., 2016). That is, a Bayes Factor of 10 means  
 146 the data is 10 times more likely to be observed under  $H_a$  as opposed to  $H_0$ . Similarly, a Bayes  
 147 Factor of 1/10 means the data is 10 times more likely to be observed under  $H_0$  as opposed to  
 148  $H_a$ . Thus, in the context of time-series decoding, Bayes Factors allow us to directly assess  
 149 whether and how much evidence there is at a given timepoint for the alternative over the null  
 150 hypothesis and *vice versa* (Figure 2C).  
 151

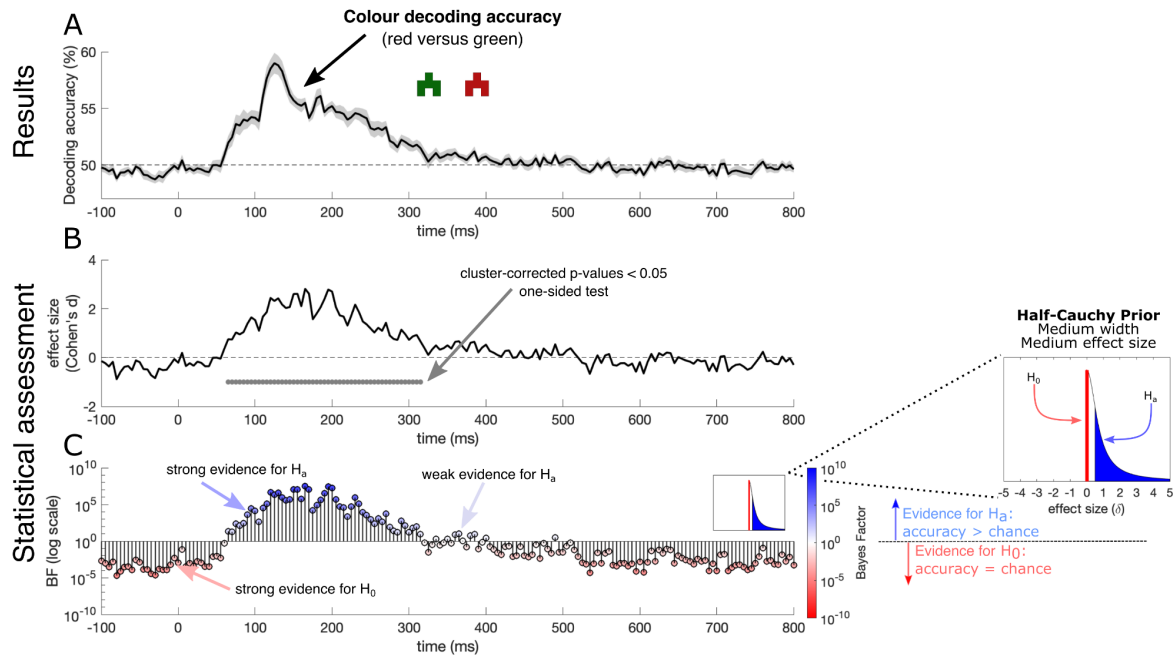

152  
 153 **Figure 2. Decoding results of our practical example dataset with statistical**  
 154 **assessments.** (A) Colour decoding over time (black line). The dashed line shows theoretical  
 155 chance decoding (50%). The grey shaded area represents the standard error across  
 156 participants. (B) Effect size over time with the cluster-corrected p-values at each timepoint  
 157 printed below in grey. (C) Bayes Factors over time for this dataset on a logarithmic scale. Blue,  
 158 upwards pointing stems indicate evidence for above-chance decoding and red, downwards  
 159 pointing stems show evidence for at-chance decoding at every timepoint. We used a hybrid  
 160 one-sided model comparing evidence for above-chance decoding versus a point-nil at  $\delta = 0$   
 161 (no effect). For the alternative hypothesis, we used a half-Cauchy prior with medium width ( $r$   
 162 = 0.707) covering an interval from  $\delta = 0.5$  to  $\delta = \infty$ . The half-Cauchy prior assumes that small  
 163 effect sizes are more likely than large ones, but the addition of the interval deems very small  
 164 effects  $\delta < 0.5$  as irrelevant. During the baseline period (i.e., before stimulus onset), the Bayes  
 165 Factors strongly support the null hypothesis, confirming the sanity check expectation.  
 166

## 167 2.2 Adjusting the prior range to account observed chance decoding

168 Bayes Factors represent the plausibility that the data emerged from one hypothesis compared  
 169 to another. In the example dataset, the two hypotheses are that decoding is at chance (i.e.,  
 170  $H_0$ , no colour information present) or that decoding is above chance (i.e.,  $H_a$ , colour  
 171 information present). To deal with the fact that observed chance decoding can be different  
 172 than the theoretical chance level, we can adjust the prior range of the alternative hypothesis

173 to allow for small effects under the null hypothesis (Rouder et al., 2009). The prior range (called  
174 “null interval” in the R package) is defined in standardized effect sizes and consists of a lower  
175 and upper bound. To incorporate the differences between observed and theoretical chance  
176 level, we can define a range of relevant effect sizes for the alternative hypothesis, for example,  
177 from  $\delta = 0.5$  to  $\delta = \infty$ . To determine which values are reasonable as the lower bound of this  
178 interval, we changed the prior range systematically and examined the effect on the resulting  
179 Bayes Factors (Figure 3). We found that smaller lower bounds at  $\delta = 0$  and  $\delta = 0.2$  resulted in  
180 weaker evidence supporting the null hypothesis than ranges starting at  $\delta = 0.5$  and  $\delta = 0.8$ .  
181 The range did not have a large effect on timepoints with strong evidence for  $H_a$ . The effect of  
182 changing the prior range is larger for the null hypothesis than the alternative as chance  
183 decoding is not exactly 50% but distributed around chance. Changing the lower bound of the  
184 prior range means that the effects that are just larger than  $\delta = 0$  can support the null  
185 hypothesis. Thus, the results here demonstrate that we can compensate for the differences  
186 between theoretical and observed chance by adjusting the prior range and effectively  
187 considering small effect sizes as evidence for the null hypothesis rather than the alternative.  
188

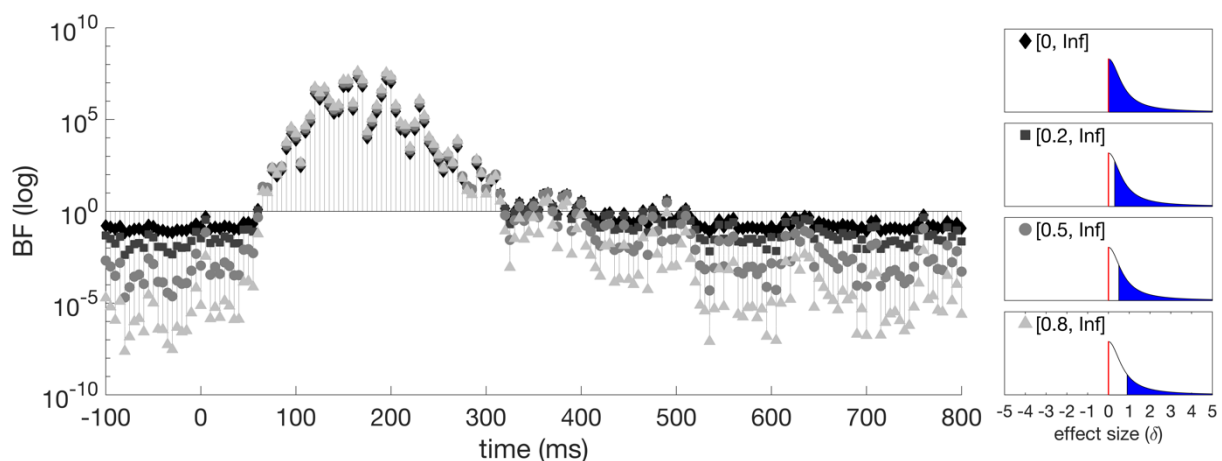

189  
190 **Figure 3. The effect of changing the prior range (null interval) on Bayes Factors in our**  
191 **example data.** Intervals starting at larger effect sizes led to more timepoints showing  
192 conclusive evidence for  $H_0$ . This is due to the fact that theoretical and observed chance levels  
193 are not the same. The panels on the right show the prior distributions with the different null  
194 intervals.  
195

196 To further examine what a reasonable lower bound of the prior range is, we looked at effect  
197 sizes observed during the baseline window (before stimulus onset) in a selection of our  
198 previous studies (Grootswagers et al., 2021; Grootswagers, Robinson, & Carlson, 2019a;  
199 Moerel, Grootswagers, et al., 2021; Moerel, Rich, et al., 2021; Teichmann et al., 2018, 2020).  
200 Using the baseline window allows us to quantify the difference between theoretical and  
201 observed chance, as we do not expect any meaningful effects before stimulus onset (e.g.,  
202 stimulus colour is not decodable before the stimulus is presented). Thus, the baseline period

203 can effectively tell us which effect sizes can be expected by chance. Using this method, we  
204 estimated maximum effect sizes for different analyses in each paper (see different bars in  
205 Figure 4). Across our selection of prior studies, we found an average maximum effect size of  
206  $\delta = 0.39$  before stimulus onset and an average maximum effect size of  $\delta = 1.91$  after stimulus  
207 onset (Figure 4). This survey shows that effect sizes as large as  $\delta = 0.5$  can be observed when  
208 no meaningful information is in the signal. Thus, this supports the conclusions from the  
209 example dataset showing that prior ranges with a lower bound of  $\delta = 0.5$  may be a sensible  
210 choice when using Bayes Factors to examine time-series M/EEG decoding results.  
211

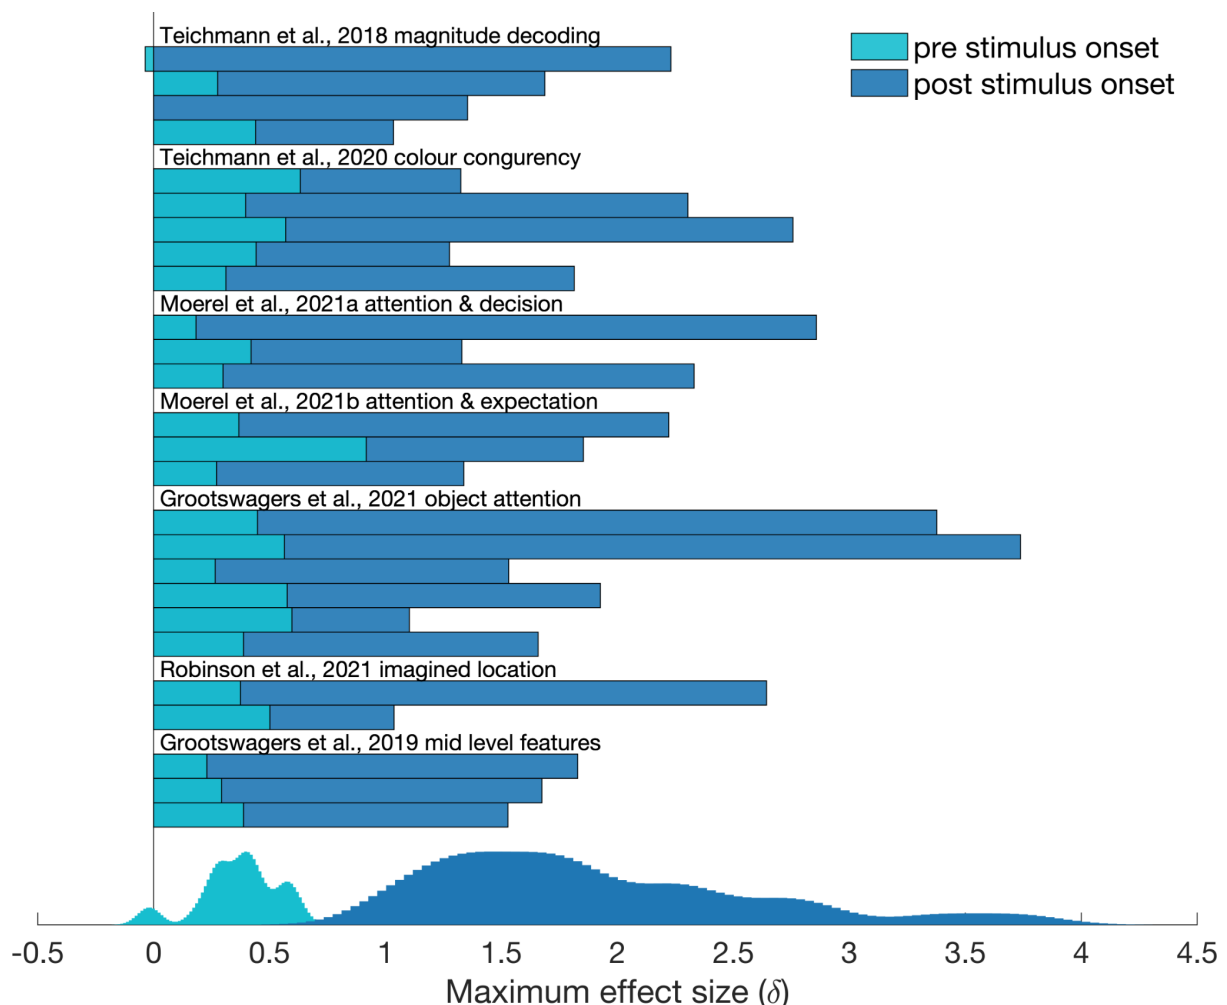

212

213 **Figure 4. Estimated maximum effect sizes during baseline and after stimulus onset for**  
214 **prior decoding studies that used visual stimuli.** Using already published data, we  
215 calculated the maximum effect sizes during the baseline (light blue) and post-stimulus (dark  
216 blue) to estimate typical peak effect sizes in visual decoding studies. Each bar represents a  
217 unique analysis within the paper. The estimations show that a reasonable range for  $H_a$  would  
218 start at  $\delta = 0.5$  or above, as during baseline decoding accuracies corresponding to  
219 standardized effect sizes as high as  $\delta = 0.5$  were observed.  
220

220



### 221 2.3 Changing the prior width to capture different effect sizes

222 Another feature that can be changed in the Bayesian t-test is the width of the half-Cauchy  
223 distribution (referred to as r-value in the Bayes Factor Package). Small r-values create a  
224 narrower, sharply peaking distribution, whereas larger values make the distribution wider with  
225 a prolonged peak. Standard prior widths incorporated in the Bayes Factor R package are  
226 medium (r = 0.707), wide (r = 1), and ultrawide (r = 1.414). Keeping the prior range consistent  
227 ([0.5, Inf]) while using the three prior widths implemented into the R Bayes Factor Package  
228 (medium = 0.707; wide = 1; ultrawide = 1.414). We found that changing the width of the  
229 Cauchy prior did not have a pronounced effect on the Bayes Factors (Figure 5). In our specific  
230 example, this is probably the case because the effect sizes quickly rose to  $\delta > 2$  (Figure 2b)  
231 which means that the subtle differences between the different prior widths do not have a  
232 substantial effect on the likelihood of the data arising from  $H_a$  over  $H_0$ . Thus, using the default  
233 prior width (r = 0.707) for the decoding context seems like a reasonable choice.

234

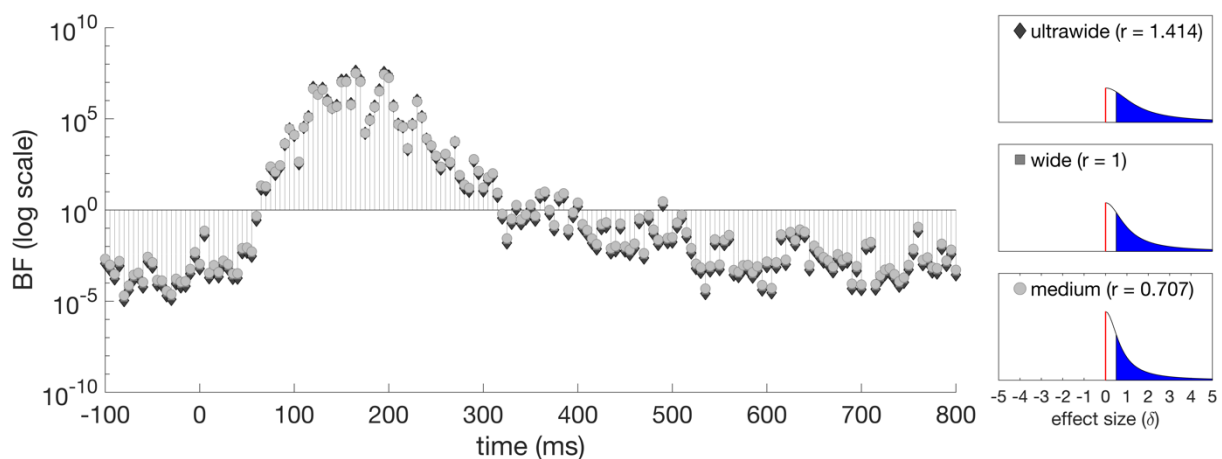

235

236 **Figure 5. Bayes Factors over time for the example data set when the prior width is**  
237 **changed.** The width of the prior had no pronounced effect on the Bayes Factors we calculated.  
238 The panels on the right show the prior distributions with the different widths.

239

### 240 2.4 The effect of data size on statistical inferences

241 In a lot of cases, there are financial and time limits on how many participants can be tested  
242 and for how long. To obtain an estimate of how much data is needed to draw conclusions and  
243 avoid ending up with underpowered studies, we used the example dataset and reduced the  
244 data size for analysis. As classification analyses are usually run at the subject level but  
245 statistical assessment is run at the group level, we tested how changing data size both by trial  
246 numbers and participant numbers influences Bayes Factors in the time-series decoding  
247 context (Figure 6). In the original example dataset, the classifier was trained on 1408 trials  
248 and tested on 352 trials (5-fold cross-validation). There were five different shapes in the red  
249 and the green condition (160 repetitions for each coloured shape) and the cross-validation

250 schema was based on leaving all trials of one shape out for testing. Statistical inferences were  
251 drawn on the group level which contained data from 18 participants. To examine the effect of  
252 data size (and effectively noise level) on the Bayes Factor calculations, we re-ran the analysis  
253 reducing the data size first by retaining the first 1200 (75%), 800 (50%), 400 (25%), or 160  
254 (10%) trials participants completed. We cross-validated in the same way as in the original  
255 paper, with the only difference being how many trials of each shape were included. In addition,  
256 we subsampled from the whole group, retaining data from the first 6, 12, or all 18 participants  
257 and re-ran the statistical analysis. We then compared the results from the reduced-size colour  
258 datasets using Bayes Factors and cluster-corrected p-values<sup>1</sup>.

259  
260 Overall, our analyses highlight that we need to have a large enough number of trials and a  
261 large enough number of participants to draw firm conclusions about our time-resolved  
262 decoding results. Testing more participants resulted in stronger evidence for  $H_a$  and  $H_o$ , with  
263 fewer timepoints in the inconclusive range (Bayes Factors) and more significant above-chance  
264 decoding timepoints (p-values). Similarly, running the classification with more trials, led to  
265 more timepoints with large Bayes Factors supporting  $H_a$  and more above-chance decoding  
266 timepoints. However, one of the key advantages of using Bayes Factors instead of p-values  
267 is that we can potentially obtain a good idea of how many trials are needed even if we run a  
268 pilot experiment with a limited number of participants. A reasonable strategy would be to  
269 overpower the subject-level data (i.e., number of trials) for the pilot sample and then sub-  
270 sample to explore how many trials are needed. In our example, we can see that the amount  
271 of evidence for  $H_a$  at peak decoding is not sufficient when we only use 160 trials (10% of the  
272 original sample), regardless of the number of subjects. Increasing the trials to 400 or 800 (25%  
273 or 50% of the original sample) leads to similar conclusions as using all 1600 trials. As Bayesian  
274 statistics allow for sequential sampling, we could collect data from more participants until a  
275 criterion is reached. For example, if we had pre-defined a stopping criterion as 80% of the  
276 timepoints being in the conclusive range (Bayes Factors larger than 6 or smaller than 1/6), we  
277 would have been able to stop collecting data after 9 participants completed 1600 trials or after  
278 18 participants completed 400 (Figure 6c). Overall, the data suggest that insufficient data at  
279 the subject-level ultimately leads to inconclusive evidence, highlighting that a large number of  
280 trials is just as, if not more important, than large numbers of participants.

281

282

---

<sup>1</sup> In comparison to the original paper, we did not use trial label permutations. Instead, we performed sign-flip permutations (which reduces the computational time) as implemented in CoSMoMVPA to generate the null distribution.

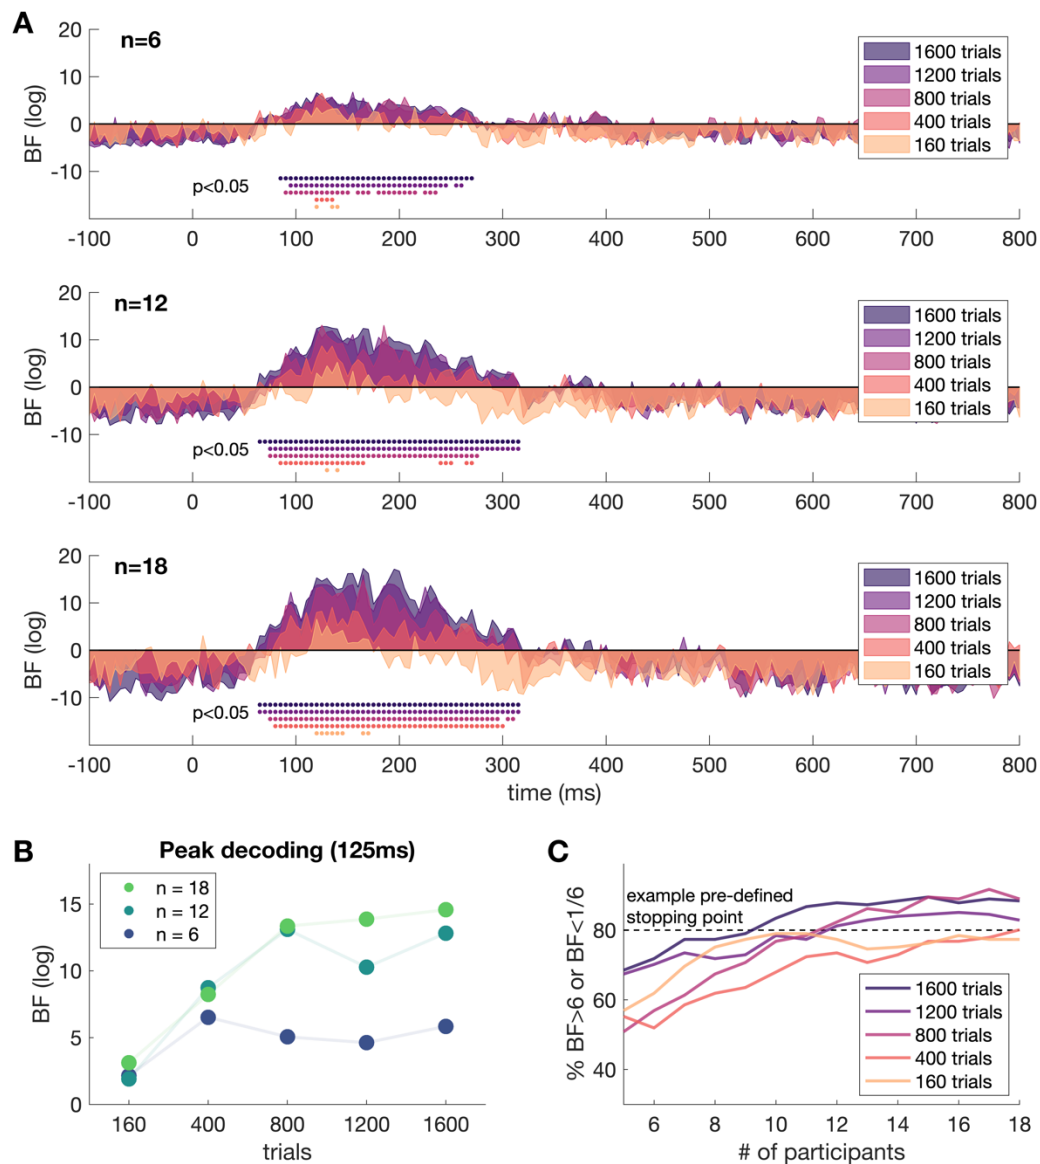

283

284 **Figure 6. Results of the colour MEG decoding study, using a limited number of trials**

285 **and participant data to simulate a piloting scenario. (A) The first three plots show Bayes**

286 **Factors over time along with cluster-corrected p-values. The colour in all plots reflects the**

287 **number of trials used to train and test the classifier. (B) Compares Bayes Factors at peak**

288 **decoding (125ms) for the different data sizes. (C) Compares how many participants would**

289 **have needed to be tested given the different number of trials with an example pre-defined**

290 **stopping point. For example, with 1600 trials and >9 participants, 80% of the Bayes factors (at**

291 **different time points) exceeded 6 or 1/6. With fewer trials, more participants are needed to**

292 **reach this example stopping point.**

293

294 The example dataset provides insight into the effect of parameters such as data size and prior  
295 shape on Bayes Factors. However, it is possible that different studies find different effect sizes.  
296 We simulated larger datasets with fixed effect sizes between  $\delta = 0$  and  $\delta = 1$  to examine the  
297 interaction of sample size with different prior ranges for different effect sizes (Figure 7). We  
298 simulated 1000 datasets with specific effect sizes for each sample size and calculated the  
299 Bayes Factors. We then calculated the median Bayes Factor for each sample- and effect size  
300 combination to show how prior range choices interact with the possibility of finding evidence  
301 for effects of different sizes. Specifically, we compared a prior range of 0.5 to infinity (Figure  
302 7A) to a prior range of zero to infinity (Figure 7B).

303

304 When specifying the prior range to 0.5 to infinity (Figure 7A), our results show that small  
305 sample sizes are sufficient to draw solid conclusions when the effect sizes are near the  
306 extremes. For example, the simulations showed that there is substantial evidence for  $H_0$  from  
307 a small sample size if the true effect is very small. In contrast, if the effect size fell in between  
308 the specified ranges for the prior of  $H_a$  and  $H_0$  (i.e., between 0 and 0.5), we found that small  
309 sample sizes tended to result in inconclusive Bayes Factors neither supporting  $H_a$  or  $H_0$ .  
310 However, if the sample size increased, the confidence that these effects were “real” also  
311 increased and therefore resulted in stronger confidence supporting one of the hypotheses.  
312 Importantly, however, large sample sizes did not automatically lead to an interpretable Bayes  
313 Factor if the effect was truly in between the specified prior ranges of  $H_a$  and  $H_0$ , indicating that  
314 sample size had no effect on Bayes Factors in this case.

315

316 Consistent with our results for the example data, the simulations also showed that changing  
317 the range of the prior has a strong effect on finding substantial evidence for  $H_0$ . If the prior  
318 range for the alternative is specified to start at zero (Figure 7B), it was almost impossible to  
319 find any evidence for  $H_0$ , even if the effect size was truly zero. Thus, the simulations show that  
320 defining the prior range with a gap between effects expected under  $H_0$  and  $H_a$  is critical and  
321 that more data leads to larger Bayes Factors, but only if there is a true underlying effect.

322

323

324

### A With interval

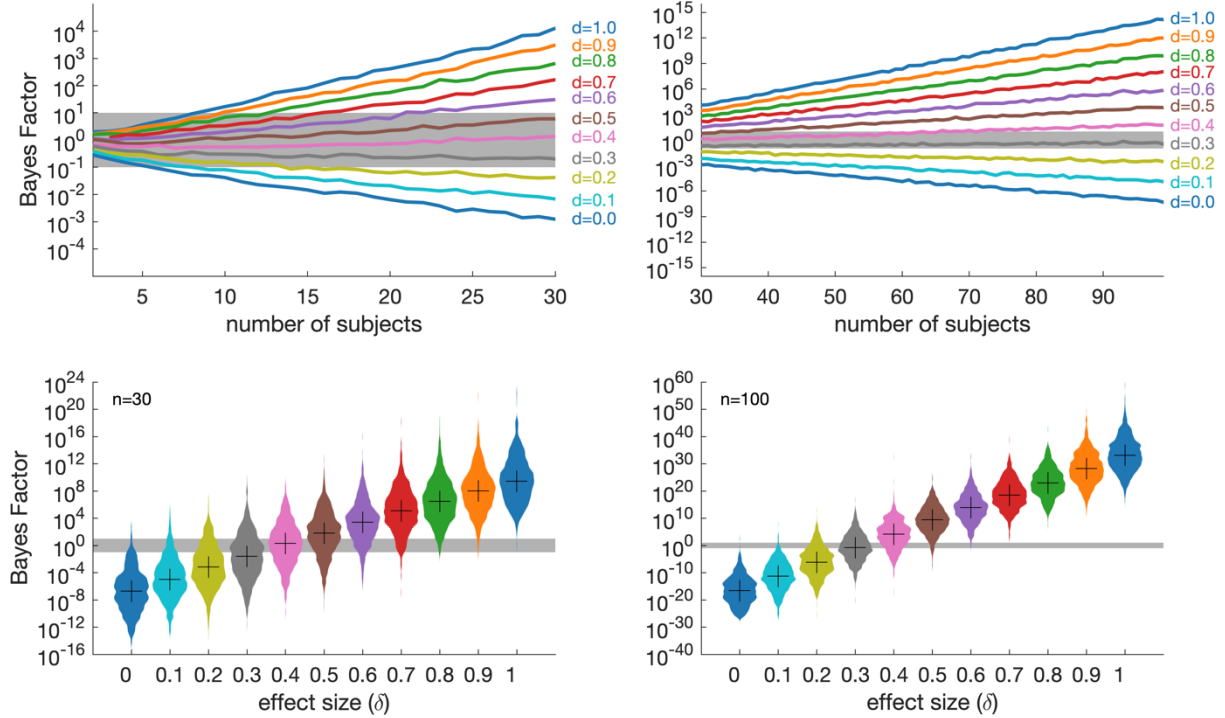

### B Without interval

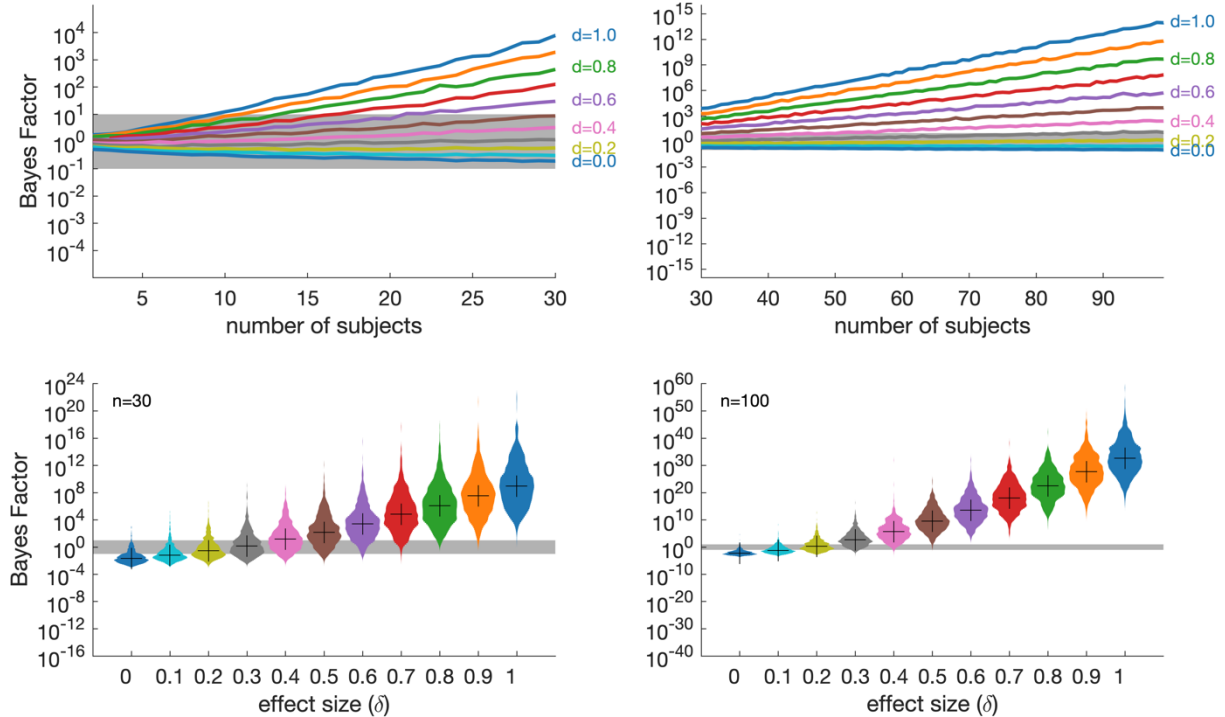

325

326

327 **Figure 7. Simulated data varying effect sizes and numbers of participants highlight the**  
 328 **rationale for using an interval.** We performed 1000 simulations to demonstrate how the  
 329 Bayes Factors behave with different sample sizes given different effect sizes. A shows Bayes  
 330 Factors obtained by using a half-Cauchy prior with an interval  $[0.5 \text{ Inf}]$ . B shows Bayes Factors  
 331 obtained by using a half-Cauchy prior without an interval. The first and third rows show the  
 332 median Bayes Factors of 1000 simulations as a function of the number of participants. The

333 second and fourth rows show the distribution of the Bayes Factors from 1000 simulations  
334 using 30 participants (left panels) and 100 participants (right panels). The distributions of the  
335 Bayes Factors highlight the rationale for using an interval, as without an interval it is nearly  
336 impossible to find substantial evidence for the null hypothesis even when the effect size equals  
337 zero.

338

339

340

## 341 Discussion

342 Bayes Factors have seen a recent increase in popularity in cognitive science, as they can be  
343 used to provide quantifiable evidence for contrasting hypotheses. However, their uptake has  
344 to date been slow for neuroimaging experiments. To facilitate their adoption, we have provided  
345 an empirically-driven guide on implementing Bayes Factors for time-series neuroimaging  
346 decoding, using both real and simulated data. We showed that using Bayes Factors and  
347 cluster-corrected p-values lead to similar results when statistically assessing time-series  
348 neuroimaging decoding results. However, the key advantages of using Bayes Factors are the  
349 ability to compare evidence for  $H_a$  with evidence for  $H_0$  and having results that are quantifiable  
350 (e.g., Dienes, 2014; Wagenmakers et al., 2016). Our results show that for time-series  
351 decoding data, half-Cauchy priors with default width and an interval ranging from effect sizes  
352 of 0.5 to infinity provide sensible results. We also show that even a small number of  
353 participants can yield informative Bayes Factors, which can be useful for making decisions on  
354 experimental design parameters (e.g., number of trials) during piloting stages of a study.

355

356 Our results showed that the overall conclusions derived from Bayes Factors and p-values  
357 were quite similar, highlighting that theoretical considerations should be the deciding factor  
358 when choosing a statistical approach to analyse neural time-series data. In the decoding  
359 context, p-values afford a dichotomous decision of whether there is enough evidence to reject  
360 the hypothesis that decoding is at chance at a given timepoint. Rejecting the null hypothesis  
361 is decoupled from any prior beliefs or theories (Dienes, 2011) and is linked to an accepted  
362 overall error rate such as  $\alpha = 0.05$ . P-values allow us to test for the presence of an effect at a  
363 given timepoint using widely accepted thresholds for evidence. While Bayes Factors can in  
364 principle also be thresholded to draw dichotomous conclusions, one of the added benefits of  
365 Bayes Factors over p-values is the ability to quantify the evidence. Another useful benefit of  
366 using Bayes Factors to analyse time-series decoding data is that Bayes Factors allow us to

367 accrue evidence for above-chance as well as at-chance decoding. For time-series analyses  
368 in particular, this is a useful feature as the time period prior to stimulus onset can be considered  
369 as a control period where we would expect evidence for the null hypothesis. Testing both  
370 hypotheses simultaneously can also be a beneficial feature when the research question  
371 involves hypotheses predicting certain time-periods without any information in the neural  
372 signal (e.g., “X happens before Y” versus “Y happens before X”). Thus, depending on the  
373 research question it may be clear which statistical approach suits the time-series decoding  
374 analysis best. Otherwise, as overall conclusions do not differ, Bayes Factors and p-values can  
375 be used in a complementary way to provide quantifiable evidence for and against the tested  
376 hypotheses as well as definitive decisions (see also Lakens et al., 2020; van Dongen et al.,  
377 2019; Wagenmakers et al., 2018).

378  
379 Through our results, we provide an empirical, straightforward guide to help implement Bayes  
380 Factors and demonstrate the extent of practical benefits when using Bayes Factors for time-  
381 series neural decoding. Using a data-driven approach, we showed which analysis parameters  
382 are most suitable for statistical assessment of time-series decoding data with Bayes Factors.  
383 While the Bayes Factors in our example MEG decoding dataset were robust against changes  
384 in the predefined width of the prior, defining the prior range so that there is a gap between  $H_a$   
385 and  $H_0$  was critical for finding evidence for the  $H_0$ . This strong effect of the prior range on the  
386 resulting Bayes Factors is particularly relevant in the decoding context, as classification  
387 accuracies under the null are not symmetrically distributed around chance (cf. Allefeld et al.,  
388 2016). Thus, a gap between  $H_0$  and the lower bound of  $H_a$  ensures that small above-chance  
389 classification accuracies are not treated as evidence for  $H_a$ . Furthermore, we systematically  
390 varied dataset size and showed that using Bayes Factors for time-series decoding data is  
391 particularly beneficial when there is limited, noisy data such as in a piloting scenario, as  
392 quantifiable evidence for one hypothesis over another gives a stronger sense of whether it is  
393 worth pursuing the research question with the piloted design, or make changes (e.g., modify  
394 trial numbers or add/remove conditions). Finally, Bayes Factors can be calculated sequentially  
395 while evidence accumulation is monitored to stop once a criterion is reached (Dienes, 2011;  
396 Rouder, 2014), which can save resources and avoid underpowered studies (Wagenmakers et  
397 al., 2018). One possibility is to define a stopping criterion in terms of a percentage of timepoints  
398 where evidence is in the conclusive range of Bayes Factors (e.g., 80% of Bayes Factors are  
399 above 6 or below 1/6). As longer baselines can artificially increase the percentage of  
400 conclusive timepoints, only timepoints after stimulus onset should be considered or the  
401 duration of the baseline period should be pre-defined. As researchers generally do not have  
402 unlimited resources, it is possible to also pre-register an upper limit for the sample size (e.g.,  
403 maximum 50 participants).

404

405 An open question is to what extent our parameter choices generalize to different paradigms,  
406 analysis approaches, and modalities. The Bayes Factor parameters used here were optimized  
407 for time-series decoding. It is in principle possible to use Bayes Factors in a similar way to  
408 analyse other time-series data such as event related potentials, oscillations or regressions,  
409 however, the Bayes Factor parameters might have to be adjusted. Similarly, the analysis  
410 pipeline discussed here could be extended to other neural decoding modalities such as fMRI  
411 (see e.g., Moerel, Rich, et al., 2021). Pilot data or analyses of previous data can be used to  
412 examine how parameters have to be modified in order to get sensible results.

413

414 A final consideration is the multiple comparisons problem arising from statistically testing many  
415 time points. When using Bayes Factors, as long as the evidence for each hypothesis is  
416 interpreted at face value (and not thresholded for 'significance'), we do not need to control for  
417 multiple comparisons (Dienes, 2011, 2016a; Świątkowski & Carrier, 2020). That is because  
418 once we have established a prior and collected the data, we examine how much we have to  
419 adjust our prior beliefs given the data and compare the adjustment required for both  
420 hypotheses. This idea is not related to overall error rates and thus does not change if we  
421 sample data sequentially or run multiple tests (Dienes, 2016a). If a research question strongly  
422 depends on a dichotomous decision on multiple tests, then we advise to report corrected p-  
423 values (for which correction methods are well established) alongside the Bayes Factors.

424

425 In conclusion, we have provided an empirically-driven guide on how to use and interpret Bayes  
426 Factors for time-series neuroimaging decoding data. We show that Bayes Factors bring  
427 several advantages to interpreting time-series decoding results such as quantifiable evidence  
428 and an ability to compare evidence for above-chance with evidence for at-chance decoding.  
429 We hope this guide, and the accompanying example code  
430 ([https://github.com/LinaTeichmann1/BFF\\_repo](https://github.com/LinaTeichmann1/BFF_repo)) can serve as a starting point to incorporate  
431 Bayesian statistics to existing analysis pipelines.

432



## 433 References

- 434 Allefeld, C., Görden, K., & Haynes, J.-D. (2016). Valid population inference for information-  
435 based imaging: From the second-level t-test to prevalence inference. *Neuroimage*,  
436 *141*, 378–392.
- 437 Dienes, Z. (2011). Bayesian versus orthodox statistics: Which side are you on? *Perspectives*  
438 *on Psychological Science*, *6*(3), 274–290.
- 439 Dienes, Z. (2014). Using Bayes to get the most out of non-significant results. *Frontiers in*  
440 *Psychology*, *5*, 781.
- 441 Dienes, Z. (2016a). How Bayes factors change scientific practice. *Journal of Mathematical*  
442 *Psychology*, *72*, 78–89.
- 443 Dienes, Z. (2016b). How Bayes factors change scientific practice. *Journal of Mathematical*  
444 *Psychology*, *72*, 78–89. <https://doi.org/10.1016/j.jmp.2015.10.003>
- 445 Foster, E. D., & Deardorff, A. (2017). Open Science Framework (OSF). *Journal of the*  
446 *Medical Library Association : JMLA*, *105*(2), 203–206.  
447 <https://doi.org/10.5195/jmla.2017.88>
- 448 Grootswagers, T., Robinson, A. K., & Carlson, T. A. (2019a). The representational dynamics  
449 of visual objects in rapid serial visual processing streams. *NeuroImage*, *188*, 668–  
450 679.
- 451 Grootswagers, T., Robinson, A. K., & Carlson, T. A. (2019b). The representational dynamics  
452 of visual objects in rapid serial visual processing streams. *NeuroImage*, *188*, 668–  
453 679. <https://doi.org/10.1016/j.neuroimage.2018.12.046>
- 454 Grootswagers, T., Robinson, A. K., Shatek, S. M., & Carlson, T. A. (2019). Untangling  
455 featural and conceptual object representations. *NeuroImage*, *202*, 116083.  
456 <https://doi.org/10.1016/j.neuroimage.2019.116083>
- 457 Grootswagers, T., Robinson, A. K., Shatek, S. M., & Carlson, T. A. (2021). The neural  
458 dynamics underlying prioritisation of task-relevant information. *Neurons, Behavior,*  
459 *Data Analysis, and Theory*, *5*(1), 1–17. <https://doi.org/10.51628/001c.21174>

- 460 Hebart, M. N., & Baker, C. I. (2018). Deconstructing multivariate decoding for the study of  
461 brain function. *Neuroimage*, *180*, 4–18.
- 462 Jeffreys, H. (1939). The Theory of Probability. *The Theory of Probability*.
- 463 Jeffreys, H. (1935). Some tests of significance, treated by the theory of probability.  
464 *Mathematical Proceedings of the Cambridge Philosophical Society*, *31*(2), 203–222.
- 465 Kaiser, D., Moeskops, M. M., & Cichy, R. M. (2018). Typical retinotopic locations impact the  
466 time course of object coding. *NeuroImage*.  
467 <https://doi.org/10.1016/j.neuroimage.2018.05.006>
- 468 Karimi-Rouzbahani, H., Woolgar, A., & Rich, A. N. (2021). Neural signatures of vigilance  
469 decrements predict behavioural errors before they occur. *ELife*, *10*, e60563.
- 470 Keyesers, C., Gazzola, V., & Wagenmakers, E.-J. (2020). Using Bayes factor hypothesis  
471 testing in neuroscience to establish evidence of absence. *Nature Neuroscience*,  
472 *23*(7), 788–799.
- 473 Lakens, D., McLatchie, N., Isager, P. M., Scheel, A. M., & Dienes, Z. (2020). Improving  
474 inferences about null effects with Bayes factors and equivalence tests. *The Journals*  
475 *of Gerontology: Series B*, *75*(1), 45–57.
- 476 Ly, A., Verhagen, J., & Wagenmakers, E.-J. (2016). Harold Jeffreys’s default Bayes factor  
477 hypothesis tests: Explanation, extension, and application in psychology. *Journal of*  
478 *Mathematical Psychology*, *72*, 19–32.
- 479 Mai, A.-T., Grootswagers, T., & Carlson, T. A. (2019). In search of consciousness:  
480 Examining the temporal dynamics of conscious visual perception using MEG time-  
481 series data. *Neuropsychologia*, *129*, 310–317.  
482 <https://doi.org/10.1016/j.neuropsychologia.2019.04.015>
- 483 Moerel, D., Grootswagers, T., Robinson, A. K., Shatek, S. M., Woolgar, A., Carlson, T. A., &  
484 Rich, A. N. (2021). Undivided attention: The temporal effects of attention dissociated  
485 from decision, memory, and expectation. *BioRxiv*, 2021.05.24.445376.  
486 <https://doi.org/10.1101/2021.05.24.445376>

- 487 Moerel, D., Rich, A. N., & Woolgar, A. (2021). Selective attention and decision-making have  
488 separable neural bases in space and time. *BioRxiv*, 2021.02.28.433294.  
489 <https://doi.org/10.1101/2021.02.28.433294>
- 490 Morey, R. D., Romeijn, J.-W., & Rouder, J. N. (2016). The philosophy of Bayes factors and  
491 the quantification of statistical evidence. *Journal of Mathematical Psychology*, 72, 6–  
492 18.
- 493 Morey, R. D., Rouder, J. N., Jamil, T., & Morey, M. R. D. (2015). Package ‘bayesfactor.’  
494 *URLh* [Http://Cran/r-Project.org/Web/Packages/BayesFactor/BayesFactor.Pdf](http://Cran/r-Project.org/Web/Packages/BayesFactor/BayesFactor.Pdf)  
495 (Accessed 1006 15).
- 496 Oosterhof, N. N., Connolly, A. C., & Haxby, J. V. (2016). CoSMoMVPA: Multi-modal  
497 multivariate pattern analysis of neuroimaging data in Matlab/GNU Octave. *Frontiers*  
498 *in Neuroinformatics*, 10. <https://www.ncbi.nlm.nih.gov/pmc/articles/PMC4956688/>
- 499 Proklova, D., Kaiser, D., & Peelen, M. V. (2019). MEG sensor patterns reflect perceptual but  
500 not categorical similarity of animate and inanimate objects. *NeuroImage*, 193, 167–  
501 177. <https://doi.org/10.1016/j.neuroimage.2019.03.028>
- 502 Robinson, A. K., Grootswagers, T., & Carlson, T. A. (2019). The influence of image masking  
503 on object representations during rapid serial visual presentation. *NeuroImage*, 197,  
504 224–231. <https://doi.org/10.1016/j.neuroimage.2019.04.050>
- 505 Robinson, A. K., Grootswagers, T., Shatek, S. M., Gerboni, J., Holcombe, A., & Carlson, T.  
506 A. (2021). Overlapping neural representations for the position of visible and imagined  
507 objects. *Neurons, Behavior, Data Analysis, and Theory*, 4(1), 1–28.  
508 <https://doi.org/10.51628/001c.19129>
- 509 Rouder, J. N. (2014). Optional stopping: No problem for Bayesians. *Psychonomic Bulletin &*  
510 *Review*, 21(2), 301–308.
- 511 Rouder, J. N., Speckman, P. L., Sun, D., Morey, R. D., & Iverson, G. (2009). Bayesian t tests  
512 for accepting and rejecting the null hypothesis. *Psychonomic Bulletin & Review*,  
513 16(2), 225–237.

- 514 Świątkowski, W., & Carrier, A. (2020). There is Nothing Magical about Bayesian Statistics:  
515 An Introduction to Epistemic Probabilities in Data Analysis for Psychology Starters.  
516 *Basic and Applied Social Psychology*, 42(6), 387–412.
- 517 Teichmann, L., Grootswagers, T., Carlson, T., & Rich, A. N. (2018). Decoding digits and dice  
518 with magnetoencephalography: Evidence for a shared representation of magnitude.  
519 *Journal of Cognitive Neuroscience*, 30(7), 999–1010.
- 520 Teichmann, L., Grootswagers, T., Carlson, T., & Rich, A. N. (2019). Seeing versus knowing:  
521 The temporal dynamics of real and implied colour processing in the human brain.  
522 *NeuroImage*, 200, 373.
- 523 Teichmann, L., Quek, G. L., Robinson, A. K., Grootswagers, T., Carlson, T. A., & Rich, A. N.  
524 (2020). The influence of object-colour knowledge on emerging object representations  
525 in the brain. *Journal of Neuroscience*.
- 526 van Dongen, N. N., van Doorn, J. B., Gronau, Q. F., van Ravenzwaaij, D., Hoekstra, R.,  
527 Haucke, M. N., Lakens, D., Hennig, C., Morey, R. D., & Homer, S. (2019). Multiple  
528 perspectives on inference for two simple statistical scenarios. *The American*  
529 *Statistician*, 73(sup1), 328–339.
- 530 Wagenmakers, E.-J., Marsman, M., Jamil, T., Ly, A., Verhagen, J., Love, J., Selker, R.,  
531 Gronau, Q. F., Šmíra, M., & Epskamp, S. (2018). Bayesian inference for psychology.  
532 Part I: Theoretical advantages and practical ramifications. *Psychonomic Bulletin &*  
533 *Review*, 25(1), 35–57.
- 534 Wagenmakers, E.-J., Morey, R. D., & Lee, M. D. (2016). Bayesian benefits for the pragmatic  
535 researcher. *Current Directions in Psychological Science*, 25(3), 169–176.
- 536
